# Supplementary material
Source: publisher site journal article supplement (https://www.dovepress.com/get_supplementary_file.php?f=463743.docx)
Supplement: Supplementary file 1 [file get_supplementary_file.php]

**Supplementary 1: Question Set**

The Question Set was placed onto RedCap. The RedCap ‘page breaks’ are indicated below. Question sub-questions are indicated with alphabetical letters.

| **Eligibility to complete survey** | | | | | |
| --- | --- | --- | --- | --- | --- |
| **Q#** | **Question** | **Response Type** | **Response options** | | |
| 1 | Are you a nurse licensed under APHRA | Select - drop down | Yes (continue to survey) | No (exit survey - not a participant) |  |
| 1b | [What are you licensed as] | Select - drop down | EN (including EEN) | RN/Midwife | NP |
| 1c | [Do you provide care/support to patients requiring eye care services? (Including engagement in community, primary, acute, tertiary, research/academic settings)] | Select - drop down | Yes (continue to survey) | No (exit survey - not a participant) |  |

Page break.

| **Quantitative Questions** | | | | | | | |
| --- | --- | --- | --- | --- | --- | --- | --- |
| **Q#** | **Question** | **Response Type** | **Response options** | | | | |
| 2 | Gender | Select - drop down | Male | Female | Non-binary | Prefer not to say |  |
| 3 | Age | Select from range | Range between 18-99 |  |  |  |  |
| 4 | Do you identify as Aboriginal or Torre Straight Islander | Select - drop down | Yes | No |  |  |  |
| 5 | What State/Territory do you live | Select - drop down | listed - each Australian State/Territory |  |  |  |  |
| 6 | What pre-graduate nurse training did you complete | Select - drop down | Hospital Trained | University Trained |  |  |  |
| 7 | Did you complete your under-graduate training in Australia | Select - drop down | Yes | No |  |  |  |
| 7b | [If no; indicate which nation you were trained in] | Open Text |  |  |  |  |  |
| 8 | How long have you been a nurse | Select - drop down | Increments of 5 years from 0 – 50. |  |  |  |  |
| 9 | Did you have another career before entering nursing | Select drop down | Yes | No |  |  |  |
| 9b | [If yes; describe prior career] | Open Text |  |  |  |  |  |
| 10 | Please indicate the level of training you have completed (including study you are currently undertaking) | Select - more than one option | Diploma | Bachelor | Grad Cert/Grad Dip | Masters | PhD or higher |
| 11 | Did you complete a graduate nurse workplace transition program ("Grad Year") | Select - drop down | Yes | No |  |  |  |
| 11b | [if yes; did the graduate program include rotation into eye care departments or any eye care content] | Select - drop down | Yes | No |  |  |  |
| 12 | Have you completed any course work on 'eye care' or 'ophthalmic' | Select - drop down | Yes | No |  |  |  |
| 12b | [If yes: What type of course work have you completed in eye care?] | Select - more than one option | formal certified course work | informal course work | Employer graduate nurse training program | Employer information training |  |
| 13 | Do you speak another language | Select - drop-down | Yes | No |  |  |  |
| 13b | [If yes; which languages?] | Open text |  |  |  |  |  |
| 13c | [if yes; do you speak that/those languages in the workplace] | Select - drop down | Yes | No |  |  |  |
| 14 | Have you worked overseas in a paid position where you provided eye care (excluding humanitarian/volunteer work) | Select - drop down | Yes | No |  |  |  |
| 14b | [If yes; which country did you work in?] | Open text |  |  |  |  |  |
| 15 | Are you seeking more hours of work in eye care | Select - drop down | Yes | No |  |  |  |

Page break

| **Q#** | **Question** | **Response Type** | **Response options** | | | | | | | | | | | |
| --- | --- | --- | --- | --- | --- | --- | --- | --- | --- | --- | --- | --- | --- | --- |
| 16 | Do you have more than one place of work | Select - drop down | Yes | No |  |  |  |  |  |  |  |  |  |  |
| *For the remainder of the survey, please answer the questions based on the place you work the most per-month.* | | | | | | | | | | | | | | |
| 17 | Where do you work | Select - drop down | City (Capital and regional) | Rural | Remote |  |  |  |  |  |  |  |  |  |
| 18 | What is the postcode of your main place of work | Open text |  |  |  |  |  |  |  |  |  |  |  |  |
| 19 | Do you work in an eye only faculty | Select - drop down | Yes | No |  |  |  |  |  |  |  |  |  |  |
| 20 | What types of service does your employer provide | Select - more than one option | clinic | Operating Theatre (including day surgery) | Ward | Distance/ Community | Surgeon Rooms | Emergency | Combination | Education Facility (e.g., University/ TAFE) | Research Institute |  |  |  |
| 21 | Who manages your place of work | Select - drop down | Government | Benevolent organization | Private multi-location company | Independently owned (e.g., surgeon or GP owned practice) | Not sure |  |  |  |  |  |  |  |
| 22 | What peer professionals do you work alongside | Select - more than one option | Other nurses | Ophthalmologists | Optometrists | Orthoptists | Technicians | Axillary/orderly's | Other health specialists | Researchers | Educators | Sales Teams | GP | Other |

Page break

| **Q#** | **Question** | **Response Type** | **Response options** | | | | | | | | | | |
| --- | --- | --- | --- | --- | --- | --- | --- | --- | --- | --- | --- | --- | --- |
| 23 | What is your current employment position | Select - more than one option | Novice/Graduate Nurse | Staff Nurse | Senior Staff Nurse | Clinical Nurse Specialist | Manager | Director/CEO | Educator | Project worker | Research | Professor | Other |
| 24 | What is your current contracted term | Select - drop down | Full time | Part time | Casual | Contract/ Consultant |  |  |  |  |  |  |  |
| 25 | On an average week, how many rostered hours do you do? | Select from range | 0-99 |  |  |  |  |  |  |  |  |  |  |
| 26 | On an average week, how many additional/overtime hours do you do | Select from range | 0-99 |  |  |  |  |  |  |  |  |  |  |
| 27 | Do you provide direct patient care | Select - drop down | Yes | No |  |  |  |  |  |  |  |  |  |
| 28 | What area of service do you work in during your workday | Select - more than one option | Clinic/Surgeon Rooms | ED | OT (including pre-and post op, recovery, anaesthetic, CSD and Day Surgery) | Education/ Workforce Support | Community | Research | Other | GP |  |  |  |
| 29 | How much of your workday is engaged in providing care to patients seeking eye care services? | Select - drop down | only eyes | mostly eyes | infrequently eyes |  |  |  |  |  |  |  |  |
| 30 | Are you required to travel as part of your main job (e.g., a vision van, Royal Flying Doctors or your employer is a multi-location organisation, and they move you between campuses) | Select - drop down | Yes | No |  |  |  |  |  |  |  |  |  |
| 31 | Do you supervise new hire graduate nurses? | Select - drop down | Yes | No |  |  |  |  |  |  |  |  |  |
| 32 | Do you supervise nursing students? | Select - drop down | Yes | No |  |  |  |  |  |  |  |  |  |
| 32b | [if yes; Have you completed any workplace or external mentor preceptor training] | Select - drop down | Yes | No |  |  |  |  |  |  |  |  |  |

Page break

| **Q#** | **Question** | **Response Type** | **Response options** | |
| --- | --- | --- | --- | --- |
| 33 | Do you currently provide extended services | Select - drop down | Yes | No |
| 33b | [If yes; describe your skill] | Open Text |  |  |
| 33c | [This question for NP only: Do you have a Medicare number relevant to eye care provision] | Select - drop down | Yes | No |

Page break

| **Q#** | **Question** | **Response Type** | **Response options** | |
| --- | --- | --- | --- | --- |
| 34 | Do you identify as an eye nurse | Select - drop down | Yes | No |
| 34b | [If yes or no; Explain your response] | Open Text |  |  |
| 35 | Are you a member on an eye/ophthalmic nurse association | Select - drop down | Yes | No |
| 35b | [If no; why not] | Open Text |  |  |
| 36 | Have you voluntarily participated in international development (humanitarian) programs | Select - drop down | Yes | No |
| 36b | [If yes; name, the organisation and countries worked in] | Open Text |  |  |
| 37 | Have you ever been employed/contracted/paid to work in international development (humanitarian) programs | Select - drop down | Yes | No |
| 37b | [If yes; name, the organisation and countries worked in] | Open Text |  |  |
| 38 | Have you ever published eye care related content in peer reviewed journals | Select - drop down | Yes | No |
| 38b | [If yes; which journals?] | Open Text |  |  |
| 39 | Have you ever presented eye care related content at conferences | Select - drop down | Yes | No |
| 39b | [If yes; which conferences?] | Open Text |  |  |

Page break

| **Q#** | **Question** | **Response Type** | **Response options** | | |
| --- | --- | --- | --- | --- | --- |
| 40 | Have you read the AONANC Practice Standards | Select - drop down | Yes | No |  |
| 40b | [If yes; do you believe you practice within the AONANC Practice Standards] | Select - drop-down | Yes | No | Unsure |
| 40c | [If yes; has your employer implemented the AONANC Practice Standards into your workplace] | Select - drop down | Yes | No | Unsure |

Page break

| **Q#** | **Question** | **Response Type** | **Response options** | |
| --- | --- | --- | --- | --- |
| 41 | What attracts you to eye care | Open text |  |  |
| 42 | Are you satisfied with your current role | Select - drop down | Yes | No |

Page break

| **Q#** | **Question** | **Response Type** | **Response options** | | | |
| --- | --- | --- | --- | --- | --- | --- |
| 43 | How long do you intend to continue working in/contributing to the care for those seeking eye care services | Select - drop down | under 1 year | 1-5 years | 5-10 years | indefinitely |

Page break

| **Quantitative Questions** | | |
| --- | --- | --- |
| **Q#** | **Question** | **Response Type** |
| 44 | What are the strengths of the eye care/ophthalmic nursing profession in Australia | Open text |
| 45 | What are the weaknesses of the eye care/ophthalmic nursing profession in Australia | Open text |
| 46 | What are the opportunities available for the eye care/ophthalmic nursing profession in Australia | Open text |
| 47 | What are the threats to the eye care/ophthalmic nursing profession in Australia | Open text |
| 48 | How can Australia attract and retain more Australian nurses into eye care | Open text |
| 49 | What eye care tasks, performed by other professionals, are Australian nurses trained (could be trained) to perform | Open text |
| 50 | If Australia requires nurses to take on additional eye care task shifting (e.g., tasks traditionally performed by ophthalmologist, optometrists, or anaesthetists) can they perform these duties without impacting existing nursing services/demands | Open text |
| 51 | If Australia cannot gather sufficient quantities of nurses to perform traditional eye care nursing tasks in the future and/or extended practice tasks, how can the nursing profession support other professionals (e.g., optometrists, orthoptists, technicians) to take on tasks that nurses would otherwise have provided | Open text |
| 52 | What tasks performed by nurses could be task shifted to another professional | Open text |
| 53 | How can Australia prepare its nursing workforce to care for those seeking eye care services in 2030 and beyond | Open text |
| 54 | Do you have any final comments/suggestions | Open text |

Page break

| **Q#** | **Question** | **Response Type** | **Response options** | |
| --- | --- | --- | --- | --- |
| 55 | Can we contact you for further nurse workforce survey work? | Select - drop down | Yes | No |
| 55b | [If yes; please provide name, email, and phone number] | Open Text |  |  |

Survey End

**Supplementary 2: Additional Data**

**Quantitative Responses (Questions 1-43)**

***Qualifications***

There were n=100/238 (42%) hospital trained nurses and n=138/238 (58%) university trained nurses. There were n=209/238 (88%) that completed their training in Australia. The remaining n=29/238 (12%) were trained elsewhere, being: UK (n=6/29, 20.6%), New Zealand (n=6/29, 20.6%), The Philippines (n=4/29, 13.7%), Canada (n=3/29, 10.3%), Ireland (n=2/29, 7%) and Zimbabwe (n=2/29, 7%), with n=1/29 (3.4%) participant for each of Belgium, Germany, India, Iran, South Africa, and the USA (6 x 3.4% = 20.6%).

***Education***

Education commentary was provided by n=105/238(44%) participants. Their education sources were on-the-job, informal, and formal (certificate, post-graduate), and sector provided in-services (e.g., professional societies, agencies and industries). Education was available within Australia and abroad. Training ranged from face-to-face, online, lecture attendance, to interactive and participatory formal coursework. They identified on-the-job training providers as other nurses, ophthalmologists, optometrists, and orthoptists.

Barriers to education and progression were identified as: nurses themselves (unwillingness to change, learn and share knowledge); insufficient quantity of opportunities, the COVID pandemic’s derailment of programs, limited time (e.g. due to rostering), lack of comprehensive nature of existing courses (e.g. only covering one area such as community but not operating theatre and vice versa), lack of stability in course availability (e.g. courses that were available several years ago have ceased), expenses, access variance across the nation – with east coast mainland locations receiving the lion’s share. Finally, respondents indicated a lack of exposure at the undergraduate level (coursework and placement) and too few graduate positions.

Respondents proposed that in the future, education and training be improved. Recommendations included: more online opportunities to assist rural and remote nurses, local, state and national opportunities, training in advanced/extended practice (e.g. intravitreal injections), interdisciplinary-training, better remuneration to those with extended training and skills, exchange and fellowship programs either interstate or internationally, integration of eye care into undergraduate nurse training programs (coursework and clinical placements), increased placements for graduate and early career nurses, cross-exposure within other nursing and healthcare areas (e.g. operating theatre, day surgery or primary nurses association events, or through other healthcare areas such as diabetes), and succession planning.

***Knowledge Sharing***

From our participants, n=226/238 (95%) indicated they actively supported other nurses. Of those, n=125/226 (55%) supervised graduate nurses, and n=104/226 (46%) supervised student nurses. Despite n=226 providing training and mentorship to others, only n=48/226 (21%) had completed workplace or external mentor/preceptor training.

In terms of knowledge sharing, n=8/238 (3%) indicated they had published in peer reviewed journals, and n=46/238 (19%) indicated they had presented eye related content at conferences.

***Employer***

Employers of n=101/238(42.4%) provided a singular service, being: outpatient (n=17/101, 17%), operating theatre (n=52/101, 52%), inpatient (n=2 /101, 2%), distant/community (n=7 /101, 7%), surgeon/medical rooms (n=10 /101, 10%), and emergency (n=12/101, 12%), with one indicated as a University (n=1 /101, 1%). The remaining participants (n=137/238, 57.6%) indicated that their employer provided a combination of services, e.g., ‘operating theatre and clinic’, or ‘outpatient, attachment to a research institute and inpatient service’.

Regarding employment type, n=12/238(5%) did not provide details. The remaining indicated they were permanent part-time (n=108, 45.4%), permanent full-time (n=72/238, 30.3%), casual (n=36/238, 15.1%) and contract/consultant (n=10/238, 4.2%). While hours per week varied, n=58/238 (24%) reported working 35-40 hours per week.

There were n=226/238(95%) that volunteered further details on their employment position. Of the n=226, n=215(95%) did ‘over time’, with n=210/215(97.5%) indicating they did up to ten hours ‘over time’ per week. Lastly, n=45/226(20%) indicated that they travelled for work (e.g., mobile services).

They were employed as: general nurse (staff nurse, level 1) (n=86/226, 36%), clinical nurse specialist (n=55/226, 24.3%), manager (n=22/226, 10%), practice nurse (n=21/226, 9.2%), project worker (n=3/226, 1.3%), professor (n=2/226, .9%), clinical nurse educator (n=2/226,.9%), director/CEO (n=1, .4%), novice/graduate nurse (n=1/226, .4%), and other (n=33/226, 14.6%). There were n=215/226(95%) that provided direct patient care and n=11/226 (5%) that did not. Regarding their degree of eye care engagement, n=107/226(47.3%) worked only in eye care, n=79/226(35%) worked mostly in eye care, and n=40/226(17.7%) worked infrequently in eye care.

Finally, n=157/238(66%) worked in only one area of service. Those being: operating theatre (n=83/157, 53%), inpatient (n=23/157, 15%), clinic/surgeon rooms (n=21/157, 13.3%), emergency room (n=17/157, 11%), community (n=7/157, 4%), general practice (n=4/157, 2.5%), and lastly, education/workforce (n=2/157, 1.2%). The remaining n=81/238(34%) worked across a range of workplace services. We are unclear if this was by choice or their employer’s decision.

***Professional Eye Care Membership***

There were n=133/238 (56%) participants who indicated they were members of a state based Australian Ophthalmic Nurses Association (AONA). Collectively, the AONA groups had n=412 nurse members in 2021. Therefore, our participants represent 32% of their membership.

Due to the multiple state nature of the organisation ‘AONA’ (that encompasses ACT, NSW, NT, SA, TAS and VIC) in comparison to the single state nature of organisations ‘AONAQLD’ and ‘AONAWA’ that represent QLD and WA respectively, then we present the participant’s membership based on their location, and not their state membership. This provided the level of detail required to understand where members reside across the nation. In this approach, participants in NSW were the largest group at n=46/133 (34.5%), followed by: Victoria n=27/133 (20.3%), QLD n=24/133 (18%), WA n=15/133 (11%), SA=14/133 (10.5%), TAS n=4/133 (3%), NT n=2/133 (1.5%) and ACT n=1/133 (.7%). We found no significance between where the participant resided and the likelihood of their membership to an AONA group (*p=* .106).

Of the n=105/238 (44%) that were not members, n=77/105 (73%) indicated why they had not joined. Their reasons were: unaware of AONA (n=27/77, 35%), interested but had not yet joined (n=25/77, 32.5%), the Association did not meet their needs (n=11/77, 14%), financial barriers (n=7/77, 9%), and no interest (n=7/77, 9%). AONA was identified by n=7/98(7.1%) participants as a key factor in the development of the profession and its progression.

***Language***

There were n=49/238 (20.5%) participants that spoke a language other than English. Of the n=49, n=22/49 (45%) indicated they used their other language/s in the workplace, while n=26/49 (53%) did not, and n=1/49 (2%) did not provide further detail. There were n=38/49 (77.5%) that spoke one other language, n=5/49(10.2%) that spoke two other languages, n=5/49 (10.2%) that spoke 3 other languages, and n=1/49(2%) that spoke four other languages.

There were n=31/238(13%) languages other than English, listed by participants. The most frequently mentioned language was Cantonese, followed, by French, Tagalog, Mandarin, Malay, Spanish, Afrikaans, German, Hindi, Japanese, Nepali, Polish, Arabic, Bosnian, Croatian, Dutch, Greek, Gujarathi, Hakka, Indonesian, Italian, Khmer, Korean, Māori, Marathi, Persian, Pidgin English (PNG), Russian, Serbian, Swahili, and Vietnamese.

***Worked overseas / volunteered overseas / humanitarianism***

While our focus was on Australian engagement, we captured data on overseas engagement. We found that n=35/238 (14%) had worked (for pay) in other nations. Of those n=28/35 (80%) had worked in only 1 other country, however n=6/35 (17%) had worked in 2 other countries, and n=1/35 (3%) had worked in 4. The UK was the most frequently listed followed, in order, by Singapore, the USA, Cambodia, Canada, Germany, India, Iran, New Zealand, Papua New Guinea, Qatar, China and the Middle East region.

There were n=28/238 (11%), that had worked voluntarily for humanitarian programs (non-pay/short term). They listed ONA Network, YWAM, ORBIS International, Cambodia Vision, Pacific International Hospital, Sumba Foundation, Eyes for Africa, IRIS, IFRC and ICRC, AHHA cataract team, Myanmar Eye Care Program, East Timor Eye Program, Open Heart International, Interplast, ACPPRC-China, HEDS, and through non-formal projects whereby nurses accompanied surgeons or industry groups from Australia to other nations. We were unable to unpack the nations they worked in as participants indicated the organisation rather than the nation, and in several instances, the organisation acronym was provided without the organisation’s full name, and finally, many had worked for multiple organisations across multiple nations.

In terms of humanitarian paid work/consultancy, they listed the Red Cross, ORBIS International, Fred Hollows NZ, Australian Humanitarian Indigenous Health Program, and IFRC. Again, we are unable to unpack the specific nations nor the acronyms.

***Standards***

As the AONA Ophthalmic Nursing National Practice Standards (Practice Standards) were published in 2018 (<https://www.aona.au/wp-content/uploads/2023/02/AONA_Practice_Standards_2018.pdf>), we wanted to capture information regarding its implementation. We asked participants if they had read the Practice Standards, with n=211/238 (89%) providing a response. There were n=93/211 (44%) that said yes, n=50/211 (24%) that said no, and n=68/211 (32%) that were unaware that there were Practice Standards. Of the n=93/211 (44%) that had read the Standards, n=87/93 (93.5%) believed that they personally practiced within its framework and n=6/93 (6.5%) did not. Additionally, n=32/211 (15.2%) indicated their employer had implemented the Standards into the workplace, n=68/211 (32.2%) indicated their employer had not, and n=111/211 (52.6%) were unsure if their workplace had implemented the Practice Standards.

***Extended Practice***

Participants listed the ‘types’ of extended practice as: emergency department triage, ocular assessment, screening and referral; slit lamp examination, refraction using tele-optometry services; tonometry; fundoscopy; removal of foreign body; minor procedures, sedation, suturing, nurse led pre and post-surgery clinics, autonomous clinics including blepharitis, meibomian gland dysfunction treatment, age related macular degeneration and diabetic screening, urgent reviews, electrolysis of trichiasis, and subconjunctival injection pre Anti-VEGF, and independent fundus fluorescein angiography. We are unclear if, in all instances, the nurses performed or assisted in their tasks.

**Qualitative Responses (Questions 44-54)**

***Tasks ‘to’ nurses***

In terms of tasks ‘to’ nurses, participants believed that tasks could move to EN, RN and/or NP in rural, remote, and urban settings – especially community and primary care settings. Depending on the task type and rationale for why the nurse was assigned to that task, they believed with planning, training, and competency programs in place, that nurses had the ability to take on advanced tasks. Depending on the task, they believed this would enhance nursing, make the role more interesting, improve nurse confidence and motivation, and improve service efficiency. They believed that this would bring the Australian eye care field and nursing profession in line with its contemporise elsewhere in the world and would strengthen the multi-disciplinary approach to care. This in turn would help to attract more nurses to the profession and improve access to services for Australians. In terms of task types, they listed optometric and surgical tasks such as: intravitreal injections, sub-conjunctival anaesthetic blocks, assessments, scans and checks, nurse led clinics (e.g. cataract clinics), surgical assisting, minor procedures (e.g. removal of foreign body), and telehealth.

While supportive, they highlighted that in many instances, the demand for nurses is already high and additional tasks would increase pressure on their time and ability to perform the task, and that there were no effective training programs in place to learn the task. They also indicated that nurses already ‘picked-up the slack’ for when other professional groups elected not to do something. They described themselves as the ‘fall back’ and the ones that ‘clean-up other people’s mess.’ They were concerned that if not planned well, that some tasks given to nurses, if not planned well, would erode the value of nursing – thus detracting potential recruits. They were also concerned that they would take on more tasks without recognition or financial compensation for their additional skill level.

***Tasks ‘from’ nurses***

Participants in favour of shifting nursing tasks to other relevant staffing disciplines believed that as long as the staff member was appropriately and safely trained, protocols were in place, and appropriate tasks were transferred to them with supervision and support by a nurse or medical professional, then nurses had a responsibility to help guide and train them and impart knowledge to them. They saw this as a key step to developing shared care models and improving access to services for Australians by ensuring services (tasks) were available to meet need (e.g. adaptability across rural, remote, urban, or tertiary and community care levels) and reduce health care costs. They also believed some task shifting would alleviate pressure for the nurse – and in turn attract more nurses to the profession. They identified ‘others’ as: optometrists, orthoptists, technicians, assistants, community healthcare workers and administrators. They believed tasks such as documentation, clerical, scheduling, cleaning, stock management, assistance with daily activities, basic observations and some technician skills, e.g. screening and visual acuity testing could shift to others, however they drew the line on inpatient and operating theatre tasks (though theatre technicians were the exception).

Conversely, those against believed the focus should not be on the task shifting to others, but on the increase of the number of nurses in the workforce to help complete the nursing tasks, and that, if not performed careful, nurses could be stripped of key tasks, left deskilled, and devalued. They also indicated that sacrificing certain tasks would reduce the wholistic care approach nurses were uniquely trained to perform.

**Reference**

1. Australian Ophthalmic Nurses Association National Council. Practice Standards for Ophthalmic Nurses in Australia. Sydney. 2018. <https://www.aona.au/wp-content/uploads/2023/02/AONA_Practice_Standards_2018.pdf> Accessed 04 January 2024.
